# Supplementary material for: Alcohol Consumption and Mortality: The Khon Kaen Cohort Study, Thailand
Source: PubMed Central journal article supplement (PMC3956694; doi:10.2188/jea.je20130092), 2014-03-05
Supplement: je-24-154-s001.pdf [file je-24-154-s001.pdf]

**eTable.** Prevalence of alcohol drinking by age group (5,829 men, 12,628 women)

| Age (years) | Men            |      |             |      |                  |    |        | Women          |      |             |     |                  |      |        |
|-------------|----------------|------|-------------|------|------------------|----|--------|----------------|------|-------------|-----|------------------|------|--------|
|             | Never drinkers |      | Ex-drinkers |      | Current drinkers |    |        | Never drinkers |      | Ex-drinkers |     | Current drinkers |      |        |
|             | <i>n</i>       | %    | <i>n</i>    | %    | <i>n</i>         | %  | g/ day | <i>n</i>       | %    | <i>n</i>    | %   | <i>n</i>         | %    | g/ day |
| 30 – 39     | 105            | 21.8 | 32          | 6.7  | 344              | 72 | 6.5    | 1,122          | 71.7 | 12          | 0.8 | 431              | 27.5 | 1.2    |
| 40 – 49     | 437            | 22.2 | 148         | 7.5  | 1,382            | 70 | 4.6    | 2,981          | 67.8 | 63          | 1.4 | 1,352            | 30.8 | 0.8    |
| 50 – 59     | 552            | 25.0 | 218         | 9.9  | 1,435            | 65 | 4.0    | 3,325          | 74.1 | 71          | 1.6 | 1,089            | 24.3 | 0.6    |
| 60 – 69     | 435            | 37.0 | 158         | 13.4 | 583              | 50 | 3.1    | 1,828          | 83.8 | 31          | 1.4 | 323              | 14.8 | 0.5    |
| All         | 1,529          | 26.2 | 556         | 9.5  | 3,744            | 64 | 4.3    | 9,256          | 73.3 | 177         | 1.4 | 3,195            | 25.3 | 0.8    |
