# Supplementary material for: Alcohol Consumption and Mortality: The Khon Kaen Cohort Study, Thailand
Source: PubMed Central journal article supplement (PMC3956694; doi:10.2188/jea.je20130092), 2014-03-05
Supplement: je-24-154-s002.pdf [file je-24-154-s002.pdf]

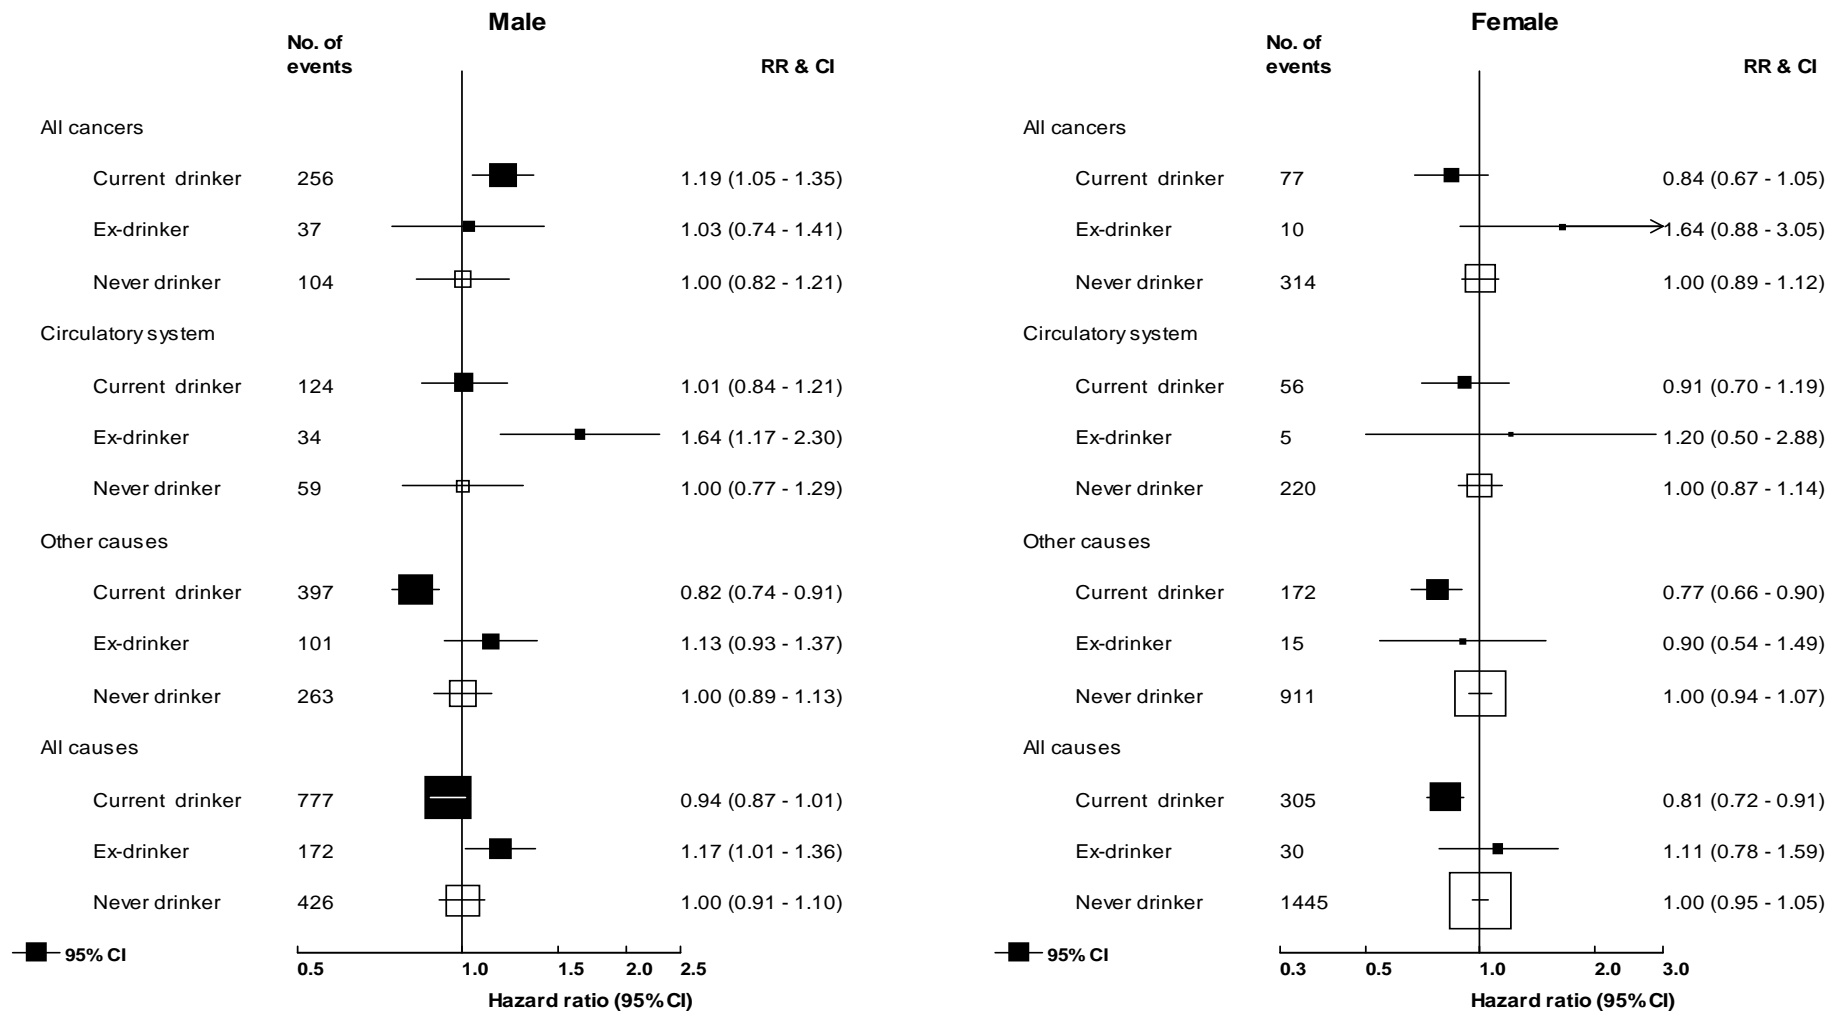

**eFigure 1.** Age-adjusted hazard ratios for disease-specific and all-cause mortality among current and ex drinkers as compared with never drinkers (men=5,829, women=12,628)
